# Supplementary material for: Small steps, strong shield: directly measured, moderate physical activity in 65 361 adults is associated with significant protective effects from severe COVID-19 outcomes
Source: HighWire-hosted journal article supplement (doi:10.1136/bjsports-2021-105159), 2022-02-09
Supplement: bjsports-2021-105159supp003_data_supplement.pdf [file bjsports-2021-105159supp003_data_supplement.pdf]

## Supplement 3

Goodness of fit metrics for the modified Poisson regression model:

| Model       | Residual deviance | p-value | Pseudo R-squared | BrierScore |
|-------------|-------------------|---------|------------------|------------|
| Admissions  | 25677             | 1       | 19.5%            | 0.085      |
| ICU         | 8119              | 1       | 30.9%            | 0.020      |
| Ventilation | 5145.5            | 1       | 31.6%            | 0.012      |
| Death       | 5738.5            | 1       | 33.3%            | 0.014      |

The Pseudo R-squared is calculated as the improvement from the null model to the fitted model.

Goodness of fit metrics for the Bayesian Network model:

|          | Admission |                   | ICU      |                   | Ventilation |                   | Death    |                   |
|----------|-----------|-------------------|----------|-------------------|-------------|-------------------|----------|-------------------|
|          | Accuracy  | Balanced Accuracy | Accuracy | Balanced Accuracy | Accuracy    | Balanced Accuracy | Accuracy | Balanced Accuracy |
| Model    | 0.866     | 0.663             | 0.969    | 0.679             | 0.981       | 0.649             | 0.979    | 0.638             |
| Baseline | 0.802     | 0.501             | 0.952    | 0.499             | 0.973       | 0.498             | 0.971    | 0.500             |
| Lift     | 8.0%      | 32.3%             | 1.8%     | 36.1%             | 0.8%        | 30.3%             | 0.8%     | 27.6%             |

The baseline accuracy measures give the level of accuracy that would be obtained if positive COVID-19 outcomes were determined through random sampling or guessing. The Bayesian Network models provide for a 32%, 36%, 30%, 28% lift in predictions for Admissions, ICU, Ventilation and Death respectively relative to the baseline.
